# Supplementary figures and images for: DPP4, the MERS coronavirus receptor, is upregulated in lungs of smokers and COPD patients
Source: Oxford University Press journal article supplement (doi:10.1093/cid/cix741), 2018-01-01

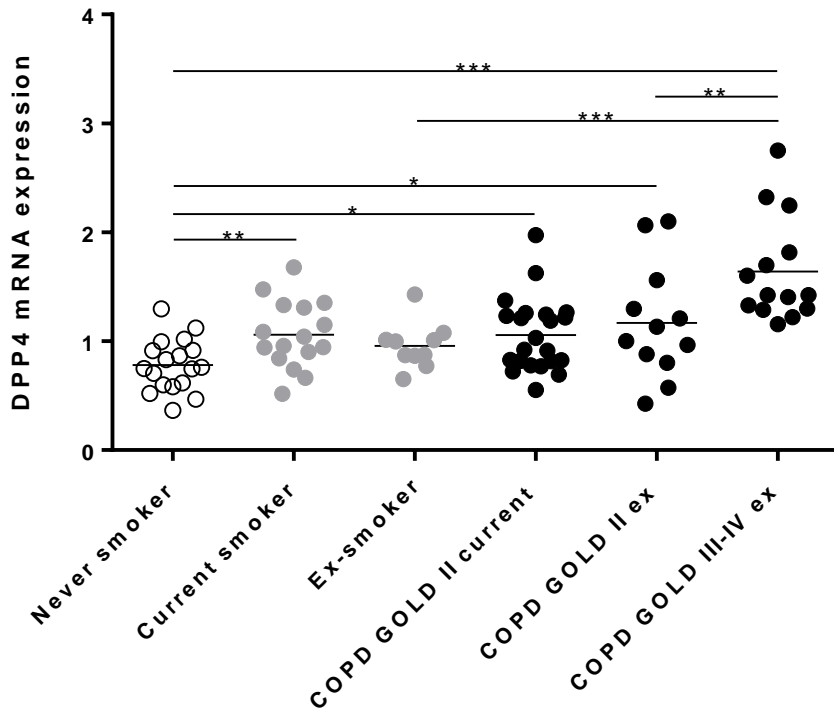

Figure S1

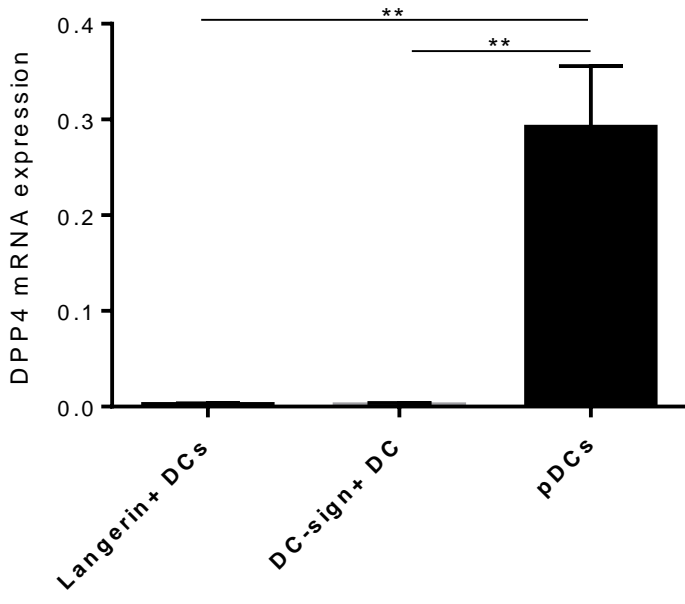

Figure S2

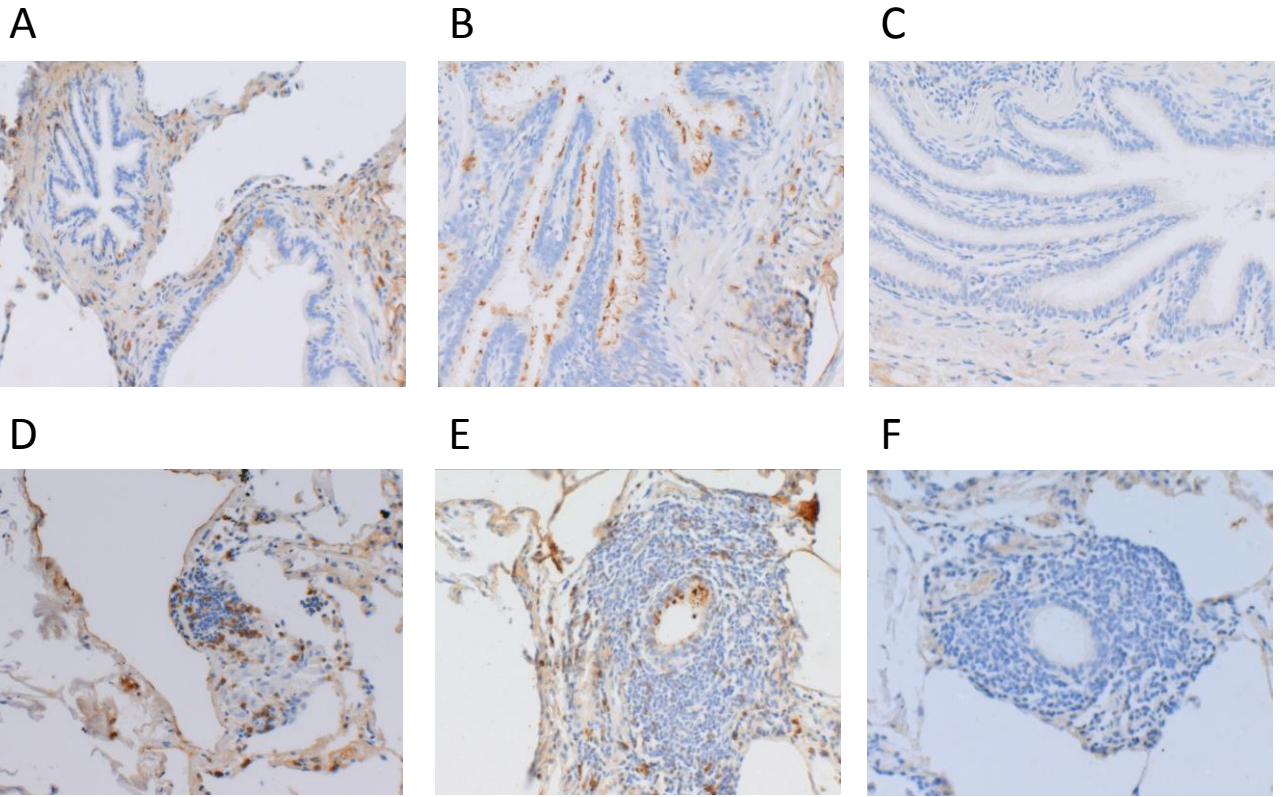

Figure S3

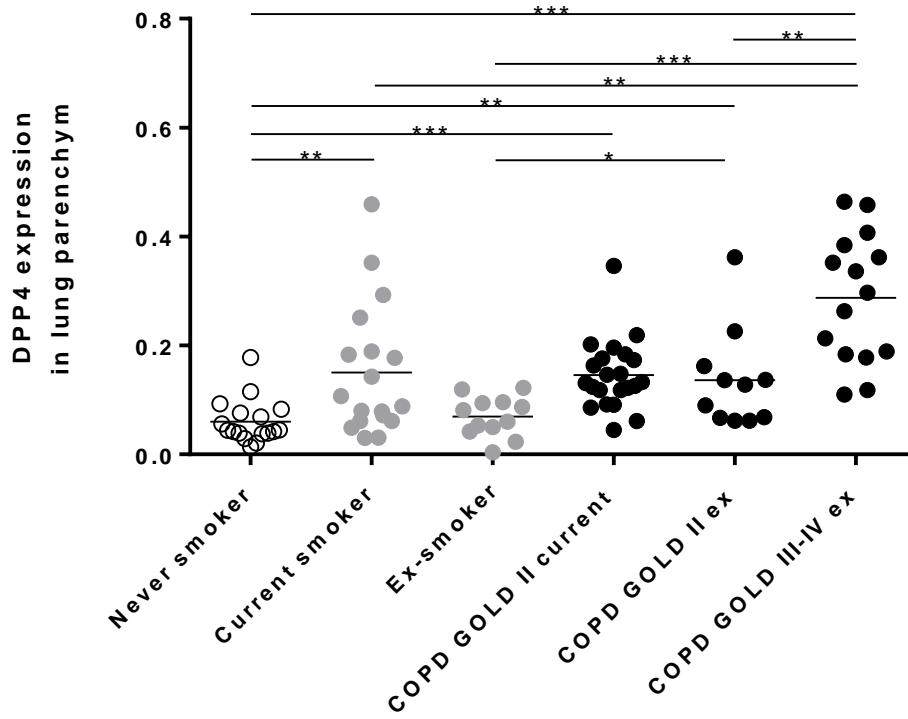

Figure S4

Supplement: cix741_suppl_supplemental_figures.pdf [file cix741_suppl_supplemental_figures.pdf]
